# Supplementary material for: Comparing Strategies and Success of Policy Entrepreneurs in EU Energy and Climate Policy Processes
Source: Preprints.org preprint supplement (doi:10.20944/preprints202409.1145.v2), 2024-09-29
Supplement: Supplementary file 1 [file supplementary]

**Supplementary material: Interview guide**

Introduction

This semi-structured interview is undertaken within a research study on strategic agency and outcomes of central actors in public policy advocacy on EU climate policy. You and your organisation have been identified as such an actor – a so-called policy entrepreneur – in the process on EU policy for [energy efficiency in buildings][energy efficiency in companies][the EE1 principle][decarbonisation of maritime shipping]. A policy entrepreneur frames a problem and policy solution, makes them into a package, and present it to decision-makers.

Interviewee data

Name: N.N.

Education: [Gymnasium/High school][Bachelor][Master][PhD]

Organisation: O.O.

Date: YYYY-MM-DD

Questions

1. Describe your role in organisation [X] and how long you’ve been employed.
2. What was your role in the work on EU policy for [energy efficiency in buildings][energy efficiency in companies][the EE1 principle][decarbonisation of maritime shipping]?
3. What is your view on the problem to be solved with the policy?
4. How would a policy look like that best mitigates the problem?
5. Did you propose your own policy solutions and policy analyses? How did you make sure that the policy proposal was in line with the public interest?
6. What was the motive for you and your organisation to engage in advocacy on this policy?
7. How did you and your organisation work to persuade other actors, including political decision-makers, in the policy process?
8. In which forums did you participate to persuade others?
9. How and with whom did you communicate?
10. What resources did you have (funding, personnel, analytical capacity, etc.)?
11. Did you engage with other policy actors in networks or advocacy coalitions to gain more resources?
12. Did your advocacy have an impact on the policy process and the final policy adopted?
13. Which strategies were successful, and which were less so?
14. Thinking about your antagonists in the policy process, do you consider their advocacy successful? Were their strategies successful?
15. I you could have done this again, would you change your strategy for advocacy?

Thank you for your participation
